# Supplementary material for: MEX3A is upregulated in esophageal squamous cell carcinoma (ESCC) and promotes development and progression of ESCC through targeting CDK6
Source: PubMed Central journal article supplement (PMC7695430; doi:10.18632/aging.103196), 2020-11-14
Supplement: aging-12-103196-s002..pdf [file aging-12-103196-s002..pdf]

## SUPPLEMENTARY TABLES

**Supplementary Table 1. Primers used in qPCR.**

| Gene   | Forward primer sequence (5'-3') | Reverse primer sequence (5'-3') |
|--------|---------------------------------|---------------------------------|
| MEX3A  | CGGAGTGGACTCTGGCTTTGAG          | CAGAGGAGAAGAGCACGGAGGT          |
| GAPDH  | TGACTTCAACAGCGACACCCA           | CACCCTGTTGCTGTAGCCAAA           |
| UGT1A7 | TGGTCGTAGTCATGCCAGAG            | GGGCACTGTAGGCAGATATTCTT         |
| RAP1A  | ACGGGTAAAGGACACGGAA             | TGCCAACTACTCGCTCATCTT           |
| CDK6   | TCCCAGGCAGGCTTTTCAT             | GGGCACTGTAGGCAGATATTCTT         |
| UGT1A5 | GCTGGGTCACACTCAATCGT            | AGGGCCTCATTATGCAGTAGC           |
| CYP1A1 | CCCTATTCTTCGCTACCTACCC          | TCTGTGATGTCCCGGATGTG            |
| NOTCH2 | TGTGAGGGAGACATCAACGAG           | TAAAGGCACTACGGCAAACAC           |
| UGT1A6 | TTCCTTGACGTGATTGGTTTC           | GGTCTTGGATTTGTGGGCTTT           |
| UGT1A3 | ATGCCATTTTCGTGGACCCAG           | TGTTCAACATTGCCATACTTCTGA        |
| THBS1  | TGTTCTCTACTGGCTTTATGTCA         | GGCCTGAGCAACTCAGTCTT            |
| CD44   | TGGGTTTCATAGAAGGGCACG           | ATACTGGGAGGTGTTGGATGTG          |
| UGT1A4 | CTGGGCTACACTCAAGGGTT            | ACAACACCTATGAAGGGCCA            |
| UGT1A1 | TGCTGGGAAGATACTGTTGATCC         | GGTGTA AAAATGCTCCGTCTCTG        |
| RECQL  | TAACAATGGCTGGAAAGGAGG           | ATCAATGGGCAAATGACGAG            |
| CA9    | TAGCCCTGGTTTTTGGCCTC            | CTAGGCTCCAGTCTCGGCTA            |
| CYP1B1 | CGACCCCAAGTCTCAATCTC            | GAGTCTCTTGGCGTCGTCAG            |
| GNB1   | GCTGTTTGACCTTCGTGCTG            | CAGTTGAAGTCGTCGTACCCA           |
| MAGED1 | GGGATGAGGAAGGAGATTTTGG          | AGCGGGCATTCTGGTGGTAT            |
| SDHD   | GCAGCACATACTTGTCCACCG           | GCAGACCCAGGAGCAAACA             |
| MFAP5  | ACTCAAGCGACTCCAGAAACAT          | TCTCATCCCAGCACTCCAAG            |
| ARNT   | TCGTGAGCAGCTTTCCACTT            | CCTCATTCGGCAAATAAACG            |

**Supplementary Table 2. Antibodies used in western blotting and IHC.**

| Primary antibodies             | Dilution in WB  | Source species | Company  | Catalog No. |
|--------------------------------|-----------------|----------------|----------|-------------|
| MEX3A                          | 1:1000          | Rabbit         | abcam    | ab79046     |
| GAPDH                          | 1:3000          | Rabbit         | Bioworld | AP0063      |
| Bad                            | 1:1000          | Rabbit         | abcam    | ab32445     |
| CD44                           | 1:2000          | Rabbit         | abcam    | ab157107    |
| CDK6                           | 1:1000          | Rabbit         | abcam    | ab151247    |
| Snail                          | 1:1000          | Rabbit         | CST      | 3879S       |
| Vimentin                       | 1:2000          | Rabbit         | abcam    | ab92547     |
| Primary antibodies             | Dilution in IHC | Source species | Company  | Catalog No. |
| MEX3A                          | 1:200           | Rabbit         | Abcam    | ab79046     |
| Ki-67                          | 1:200           | Rabbit         | Abcam    | ab16667     |
| CDK6                           | 1:100           | Rabbit         | Abcam    | ab151247    |
| Secondary antibody             | Dilution        |                | Company  | Catalog No. |
| HRP Goat Anti-Rabbit IgG (WB)  | 1:3000          |                | Beyotime | A0208       |
| HRP Goat Anti-Rabbit IgG (IHC) | 1:200           |                | abcam    | ab111909    |

**Supplementary Table 3. Relationship between MEX3A expression and tumor characteristics in patients with ESCC analyzed by Spearman rank correlation analysis.**

| <b>Tumor characteristics</b> | <b>index</b>              |         |
|------------------------------|---------------------------|---------|
| Lymph node positive          | Pearson correlation       | 0.311   |
|                              | Significance (two tailed) | 0.003** |
|                              | n                         | 92      |
| Lymphatic metastasis (N)     | Pearson correlation       | 0.280   |
|                              | Significance (two tailed) | 0.005** |
|                              | n                         | 100     |
| AJCC Stage                   | Pearson correlation       | 0.294   |
|                              | Significance (two tailed) | 0.003** |
|                              | n                         | 98      |
